# Supplementary material
Source: PubMed Central journal article supplement (PMC99603)
Supplement: mbc_13_3_847__2.pdf [file mbc_13_3_847__2.pdf]

**Supplemental table 2.** List of genes that failed to be analyzed for mitochondrial morphology defects. 19 mutants are listed that could not be analyzed for mitochondrial morphology defects because strains failed to grow in liquid media, or transformants with a plasmid expressing mitochondria-targeted GFP could not be obtained. The systematic gene name is indicated together with the standard gene name and a brief description of the protein's function (Costanzo *et al.*, 2001).

### **Strains that failed to be analyzed for mitochondrial morphology defects**

YDR115W, probable component of the mitochondrial ribosome  
YDR347W/MRP1, mitochondrial ribosomal protein of the small subunit  
YDR470C/UGO1, protein of the mitochondrial outer membrane required for mitochondrial fusion  
YER014W/HEM14, protoporphyrinogen oxidase  
YGL070C/RPB9, RNA polymerase II, non-essential subunit, not shared  
YGR262C/BUD32, may be involved in polar bud site selection in diploid cells  
YJR122W/CAF17, component of the CCR4 transcription complex  
YKL169C, unknown function; questionable ORF  
YLR304C/ACO1, aconitate hydratase (aconitase)  
YLR382C/NAM2, leucyl-tRNA synthetase, mitochondrial  
YNL064C/YDJ1, protein involved in protein import into mitochondria and ER  
YNL080C, unknown function  
YOR241W/MET7, involved in methionine biosynthesis and maintenance of mitochondrial genome  
YOR305W, unknown function  
YPL050C/MNN9, required for complex N-glycosylation  
YPL148C/PPT2, acyl carrier-protein synthase  
YPL183W-A, possible mitochondrial ribosomal protein  
YPR036W/VMA13, vacuolar H(+)-ATPase (V-ATPase) 54 kDa subunit of V1 sector  
YPR072W/NOT5, negatively regulates transcription of TATA-less promoters

### **Reference**

Costanzo, M.C. *et al.* (2001). YPD<sup>TM</sup>, PombePD<sup>TM</sup> and WormPD<sup>TM</sup>: model organism volumes of the BioKnowledge<sup>TM</sup> Library, an integrated resource for protein information. *Nucl. Acids Res.* 29, 75-79.
